# Supplementary material for: Introduction of Spiritual Psychotherapy for Inpatient, Residential, and Intensive Treatment (SPIRIT) in The Netherlands: Translation and Adaptation of a Psychotherapy Protocol for Mental Health Care
Source: MDPI journal article supplement (doi:10.3390/rel15030253), 2024-02-20
Supplement: s1 [file s1]

Archive with 1 entries (1 files):
- religions-2778214-supplementary.pdf
